# Supplementary material for: Singlet oxygen plays a key role in the toxicity and DNA damage caused by nanometric TiO2 in human keratinocytes
Source: Royal Society of Chemistry journal article supplement (doi:10.1039/c3nr01191g), 2013-01-01
Supplement: c3nr01191g.pdf [file c3nr01191g.pdf]

Fenoglio I. et al. Singlet oxygen plays a key role in the toxicity and DNA damage of nanometric TiO<sub>2</sub> to human keratinocytes

## **Supporting Information**

### Crystalline phase (XRD)

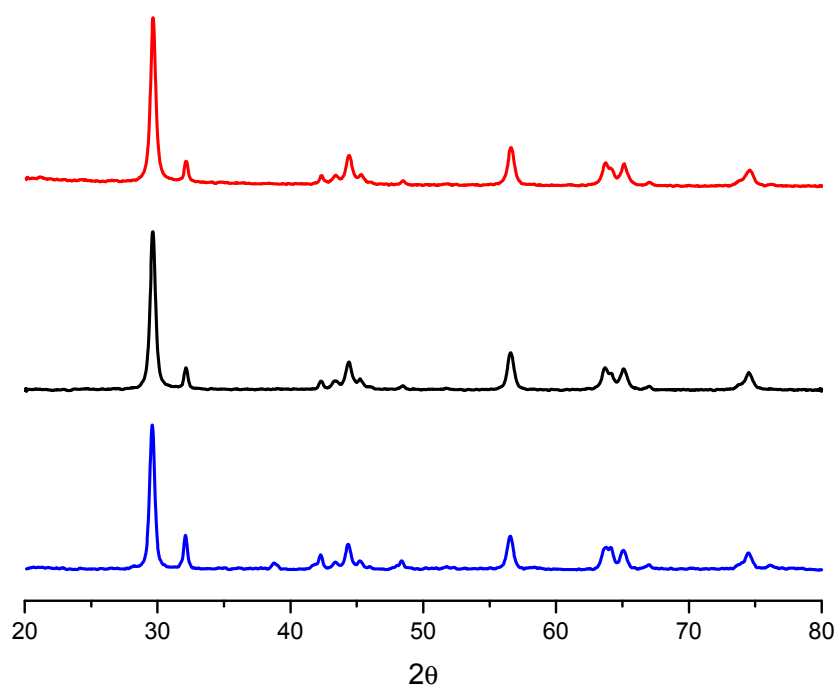

XRD diffraction patterns of pristine and modified  $\text{TiO}_2$ .  $T_{A/R}$  (blue),  $T_{A/R-C}$  (black),  $T_{A/R-Fe}$  (red).

## 2. UV-Vis shielding capacity

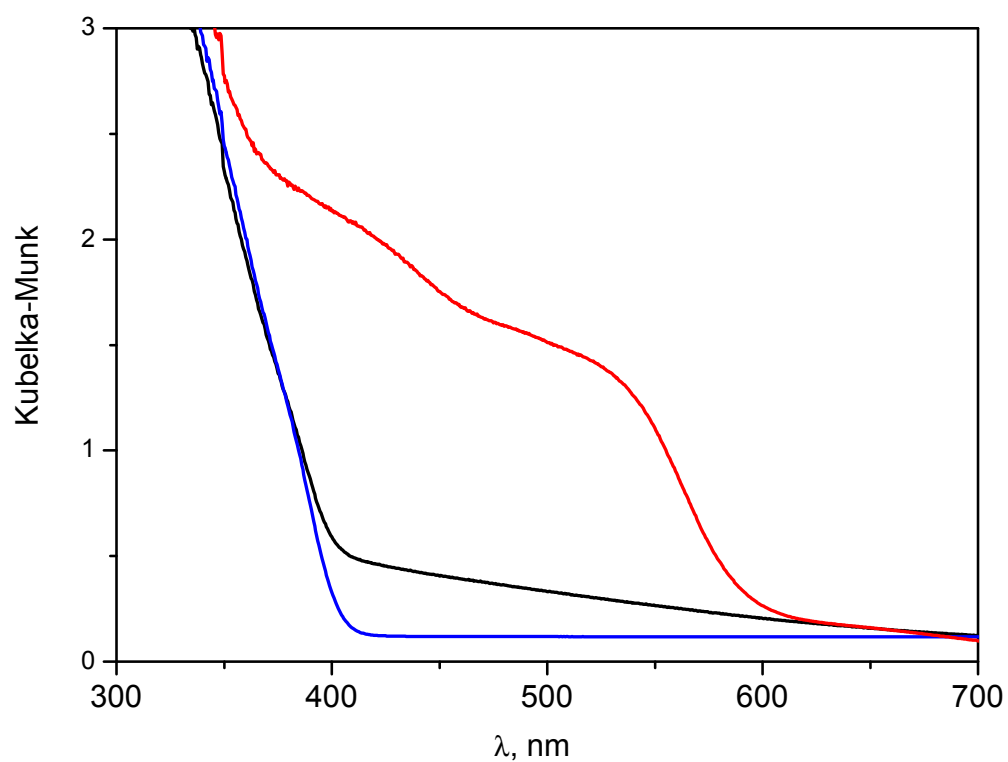

Diffuse reflectance (DR) UV-Vis spectra (processed by using the Kubelka–Munk function). T<sub>A/R</sub> (blue), T<sub>A/R-C</sub> (black), T<sub>A/R-Fe</sub> (red).

### 3. $\zeta$ potential

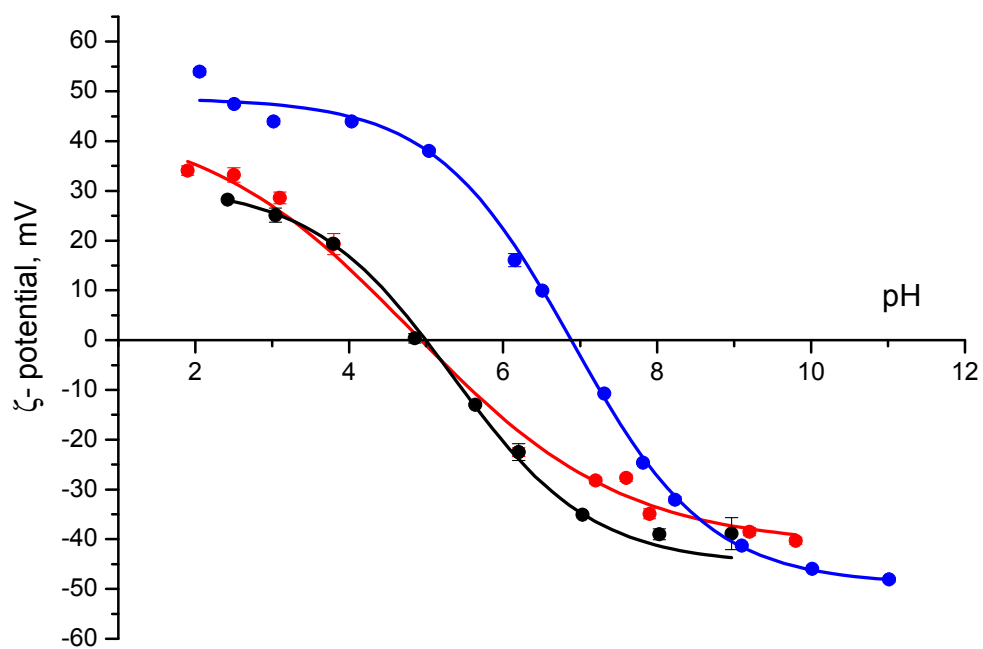

$\zeta$  potential as a function of pH for  $T_{A/R}$  (blue),  $T_{A/R}-C$  (black) and  $T_{A/R}-Fe$  (dark red) recorded in water.

#### 4. Particle size

| Sample                    | Conditions   | Water              |      | Serum free cell media |       | Cell media         |      |
|---------------------------|--------------|--------------------|------|-----------------------|-------|--------------------|------|
|                           |              | mean diameter (nm) | PDI  | mean diameter (nm)    | PDI   | mean diameter (nm) | PDI  |
| <b>T<sub>A/R</sub></b>    | 0 min        | 89                 | 1.60 | 245                   | 2.12  | 178                | 3.5  |
|                           | 15 min light | 119                | 1.64 | 471                   | 1.68  | 343                | 2.79 |
|                           | 2h dark      | 104                | 2.13 | 310                   | 2.04  | 184                | 3.03 |
| <b>T<sub>A/R</sub>-Fe</b> | 0 min        | 108                | 1.70 | 252                   | 6.50  | 247                | 1.52 |
|                           | 15 min light | 130                | 1.52 | 747                   | 10.03 | 320                | 2.02 |
|                           | 2h dark      | 105                | 1.40 | 320                   | 3.35  | 190                | 1.61 |
| <b>T<sub>A/R</sub>-C</b>  | 0 min        | 92                 | 3.44 | 192                   | 2.05  | 250                | 4.25 |
|                           | 15 min light | 121                | 2.44 | 491                   | 2.09  | 361                | 3.48 |
|                           | 2h dark      | 79.5               | 2.56 | 250                   | 3.60  | 248                | 5.52 |

Size and polydispersity index of the particles evaluated by centrifugal sedimentation (CS).

## 5. UVA/B irradiation system in cellular experiments

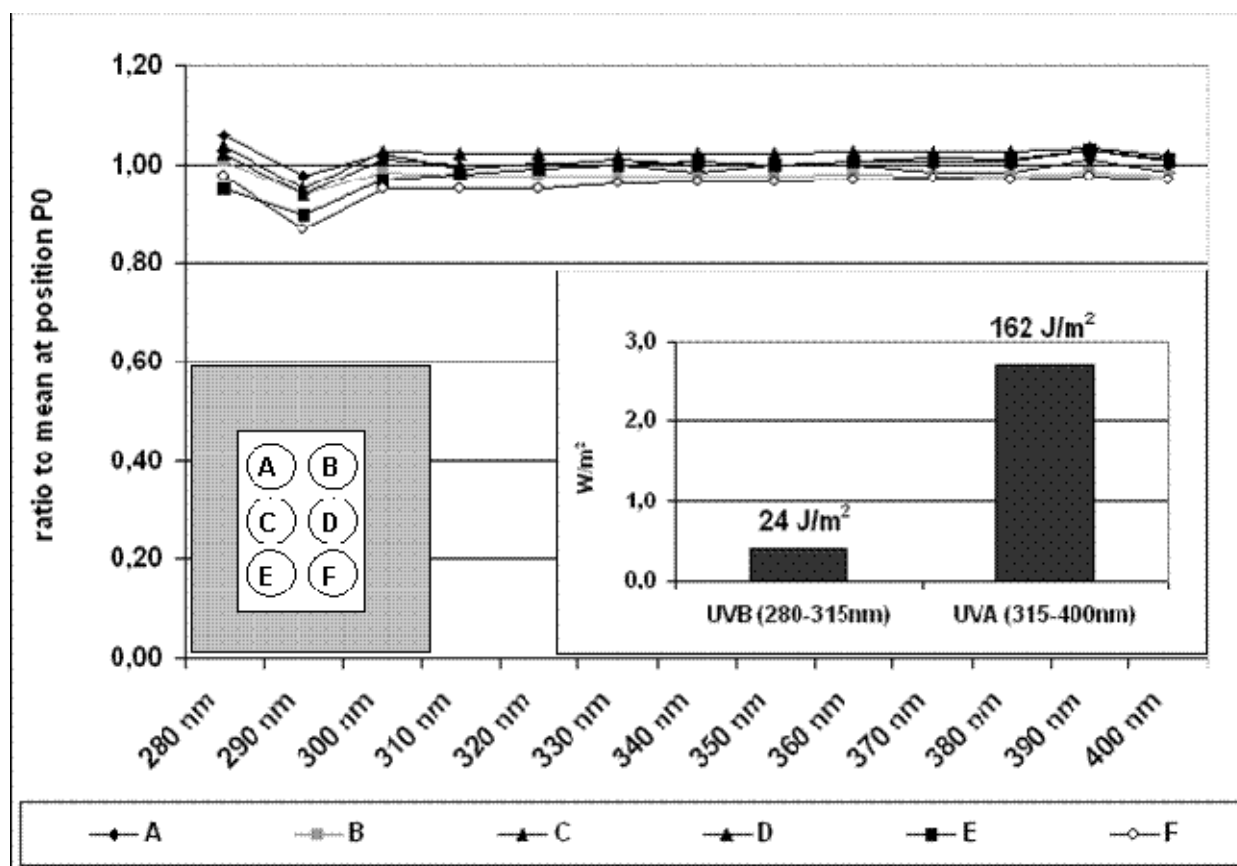

UV radiation measurements demonstrating the homogeneity over all positions of the 6 well plates at a well defined distance from the Ultralux lamp. Adapted from Sacco et al. 2010.
